# Supplementary material for: Rapid conjugation of antibodies to toxins to select candidates for the development of anticancer Antibody-Drug Conjugates (ADCs)
Source: PubMed Central journal article supplement (PMC7264231; doi:10.1038/s41598-020-65860-x), 2020-06-01
Supplement: 41598_2020_65860_MOESM1_ESM.pdf [file 41598_2020_65860_MOESM1_ESM.pdf]

# Rapid conjugation of antibodies to toxins to select candidates for the development of anti-cancer Antibody-Drug Conjugates (ADCs)

Ricarda M Hoffmann<sup>1,2</sup>, Silvia Mele<sup>1</sup>, Anthony Cheung<sup>1,3</sup>, Daniel Larcombe-Young<sup>3</sup>, Gintare Bucaite<sup>7,8</sup>, Eirini Sachouli<sup>1</sup>, Iva Zlatareva<sup>1</sup>, Hassan OJ Morad<sup>1</sup>, Rebecca Marlow<sup>3,4</sup>, James M McDonnell<sup>7,8</sup>, Mariangela Figini<sup>9</sup>, Katie E Lacy<sup>1</sup>, Andrew J N Tutt<sup>3,4</sup>, James F Spicer<sup>10</sup>, David E Thurston<sup>5,6</sup>, Sophia N Karagiannis<sup>1,2,3</sup>, Silvia Crescioli<sup>1,2,\*</sup>

**Supplementary Materials:** Fig. S1: Streptavidin-Biotin conjugation of Saporin to trastuzumab can be performed at different molar ratios resulting in decreased cell binding cell viability of ADCs conjugated at higher ratios. Fig. S2: Streptavidin-Biotin conjugation of Saporin to trastuzumab does not potentiate off-target toxicity compared to clinically available T-DM1, Fig. S3: Streptavidin-Biotin conjugation of DM1 to trastuzumab does not potentiate off-target toxicity compared to clinically available T-DM1.

a

Heavy chain trastuzumab

EVQLVESGGGLVQPGGSLRLS CAAS GFNI KDTY IHWVRQAPGKLEWVAR IYPTNGYTRYADSVKGRFT ISADTSKNT  
AYLQMNSLR AEDTAVYYCSRWGGDGFYAMDYWGQGLT LTVS SASTKGPSVFPLAPSSKSTSGGTAALGCLVKDYFPEP  
VTVSWNSGALTSGVHTFPAVLQSSGLYSLSSVVTVPSSSLGTQTYICNVNHKPSNTKVDKKVEPKSCDKTHTCPPCPA  
PELLGGPSVFLFPPKPKDTLMISRTPEVTCVVVDVSHEDPEVKFNWYVDGVEVHNAKTKPREEQYNSTYRVVSVLTVL  
HQDWLNGKEYKCKVSNKALPAPIEKTIISKAKGQPREPQVYTLPPSRDELTKNQVSLTCLVKGFYPSDIAVEWE SNGQP  
ENNYKTTTPVLDSDGSFFLYSKLTVDKSRWQQGNVFS CSVMHEALHNHYTQKSLSLS PGK

Light chain trastuzumab

DIQMTQSPSLSASVGDRTVITCRASQDVNTAVAWYQQKPKGKAPKLLIY SASF LYSYGVPSRFSGSRSGTDFTLTISSL  
QPEDFATYYCQOHYTPPTFGQGTKVEIRTVAAPSVFIFPPSDEQLKSGTASVVCLLNNFYPREAKVQWKVDNALQSG  
NSQESVTEQDSKSTYLSSTLTLSKADY EKHK VYAC EVTHQGLS SPVTKSFNRGEC

V<sub>H</sub> and V<sub>L</sub>: Framework regions (FRs), Complementarity-determining regions (CDRs)

C<sub>H</sub> and C<sub>L</sub>: Constant region

mAb: Lysines (K)

b

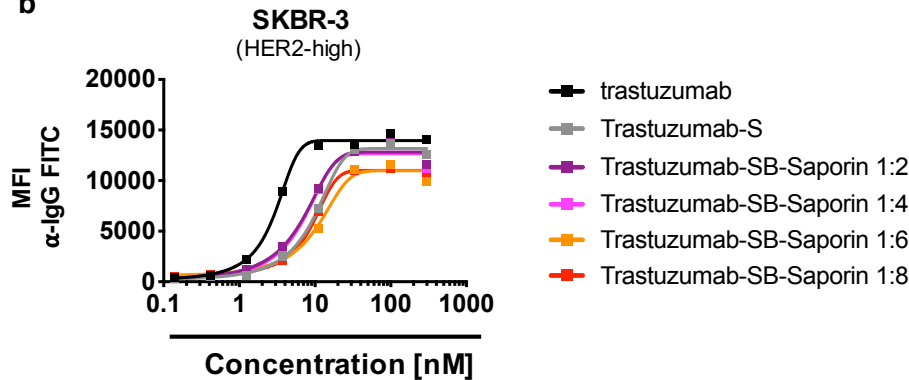

c

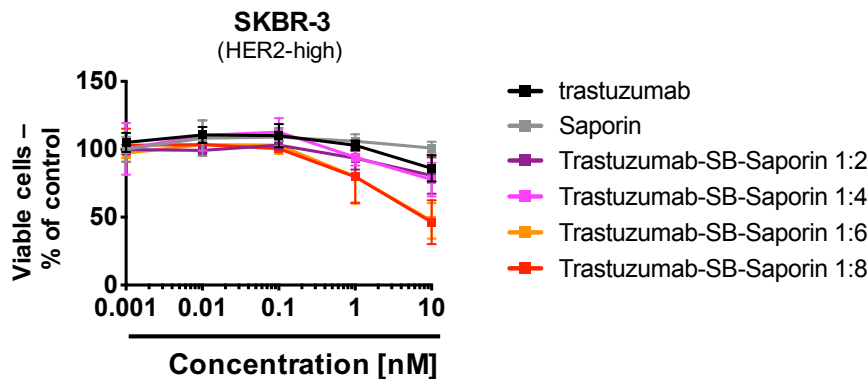

**Supplementary Fig. 1.** Streptavidin-Biotin conjugation of Saporin to trastuzumab can be performed at different molar ratios resulting in decreased cell binding and cell viability of ADCs conjugated at higher ratios. (a) Sequence of heavy and light chain of trastuzumab highlighting lysine (K) residues available for conjugation to Streptavidin in framework regions, complementarity-determining regions and constant regions. Streptavidin labelling by using the LightningLink Streptavidin kit results in the conjugation of an average of 2 molecules of Streptavidin per antibody at 41 possible lysine residues. (b) Investigation of cell binding of breast cell line SKBR-3 with high Her2 expression of Trastuzumab-SB-Saporin ADCs conjugated with 4 different ratios from 1:2 to 1:8. Streptavidin-linked trastuzumab shows reduced binding affinity to naked trastuzumab. (c) Investigation of cell viability of breast cell line SKBR-3 with high Her2 expression of Trastuzumab-SB-Saporin ADCs conjugated with 4 different ratios from 1:2 to 1:8 showing reduction in cell viability for ADCs with more Saporin conjugated per antibody. N=1 for all binding assays and N=3 independent experiments for all MTS studies, each condition performed in triplicate, error bars represent Standard Deviation (SD).

**a** Fab-mediated internalization

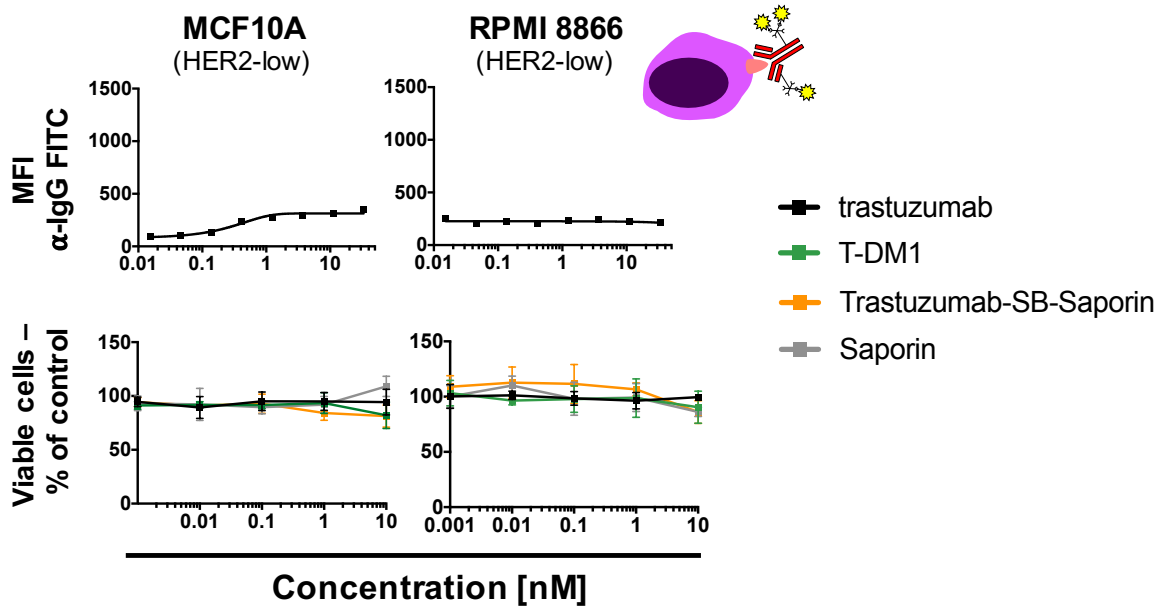

**b** Fc-mediated internalization

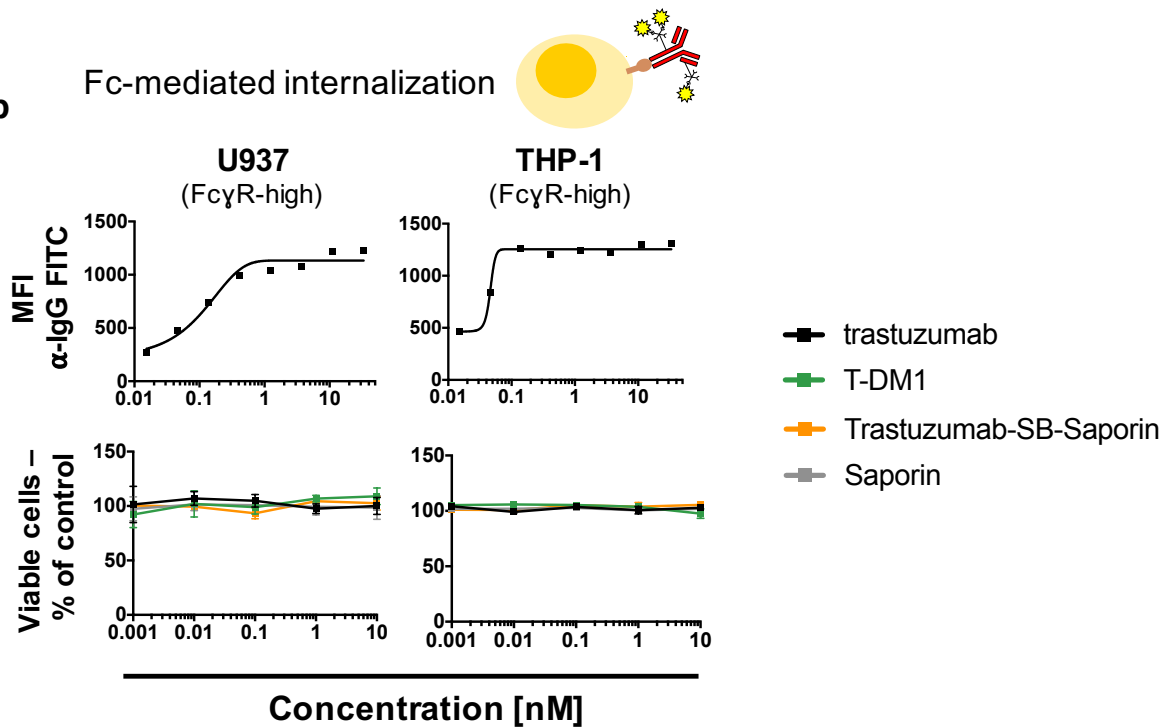

**Supplementary Fig. 2.** Streptavidin-Biotin conjugation of Saporin to trastuzumab does not potentiate off-target toxicity compared to clinically available T-DM. (a) Investigation of cell viability of breast cell line MCF10A and myeloid cell line RPMI 8866 with low Her2 expression. (b) Investigation of cell viability of monocytic cell lines U937 and THP-1 with high Fc $\gamma$ -receptor expression. Cells were treated with the naked antibody trastuzumab, control ADC T-DM1, Trastuzumab-SB-Saporin or Saporin toxin alone. N=1 for all binding assays and N=3 independent experiments for all MTS studies, each condition performed in triplicate, error bars represent Standard Deviation (SD).

## Fc-mediated internalization

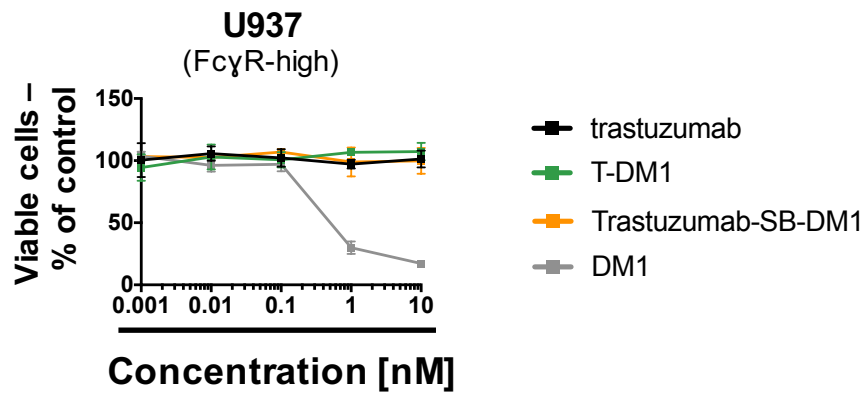

**Supplementary Fig. 3.** Streptavidin-Biotin conjugation of DM1 to trastuzumab does not potentiate off-target toxicity compared to clinically available T-DM1. Investigation of cell viability of monocytic cell line U937 with high Fcγ-receptor expression. Cells were treated with the naked antibody trastuzumab, control ADC T-DM1, Trastuzumab-SB-DM1 or DM1 toxin alone. N=3 independent experiments, each condition performed in triplicate, error bars represent Standard Deviation (SD).
